# Supplementary material for: Coffee and shade trees show complementary use of soil water in a traditional agroforestry ecosystem
Source: Copernicus journal article supplement (doi:10.5194/hess-2019-329), 2019-07-26
Supplement: Supplementary file 1 [file hess-2019-329-supplement.pdf]

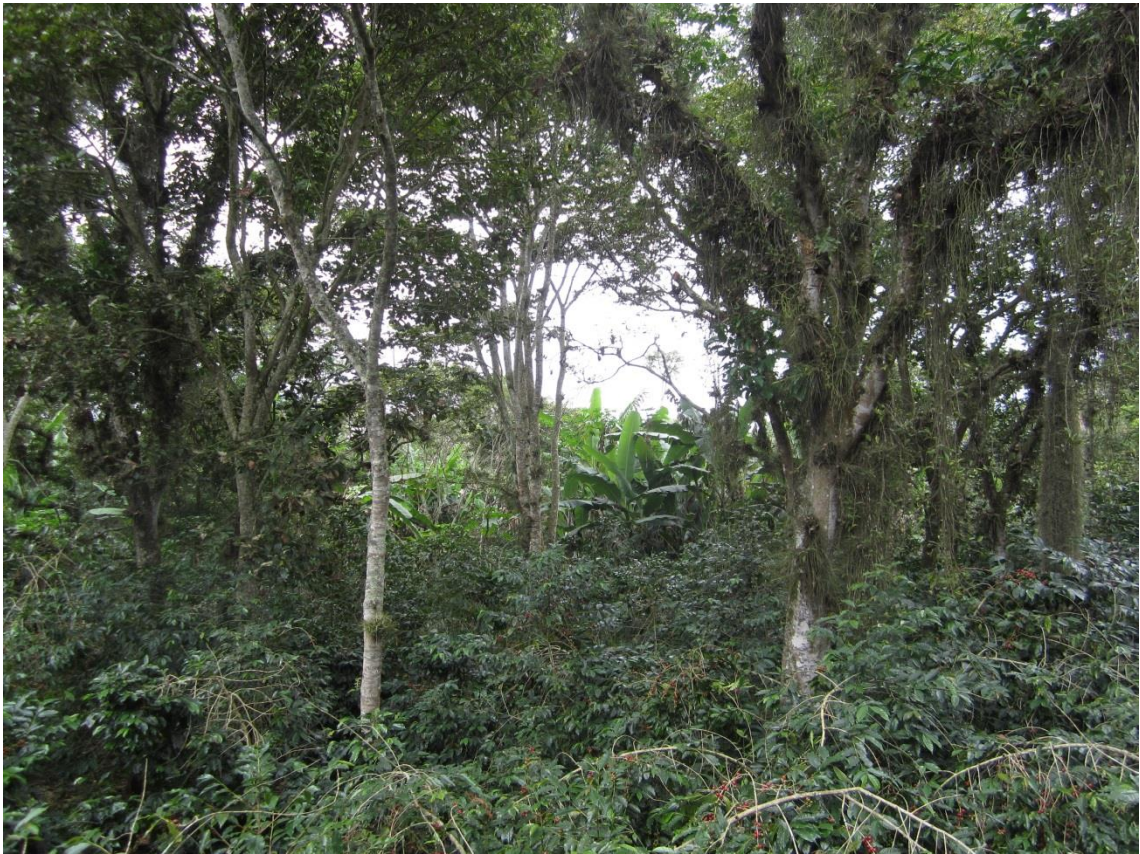

**Figure S1.** Photo of the “La Orduña” shade coffee plantation.

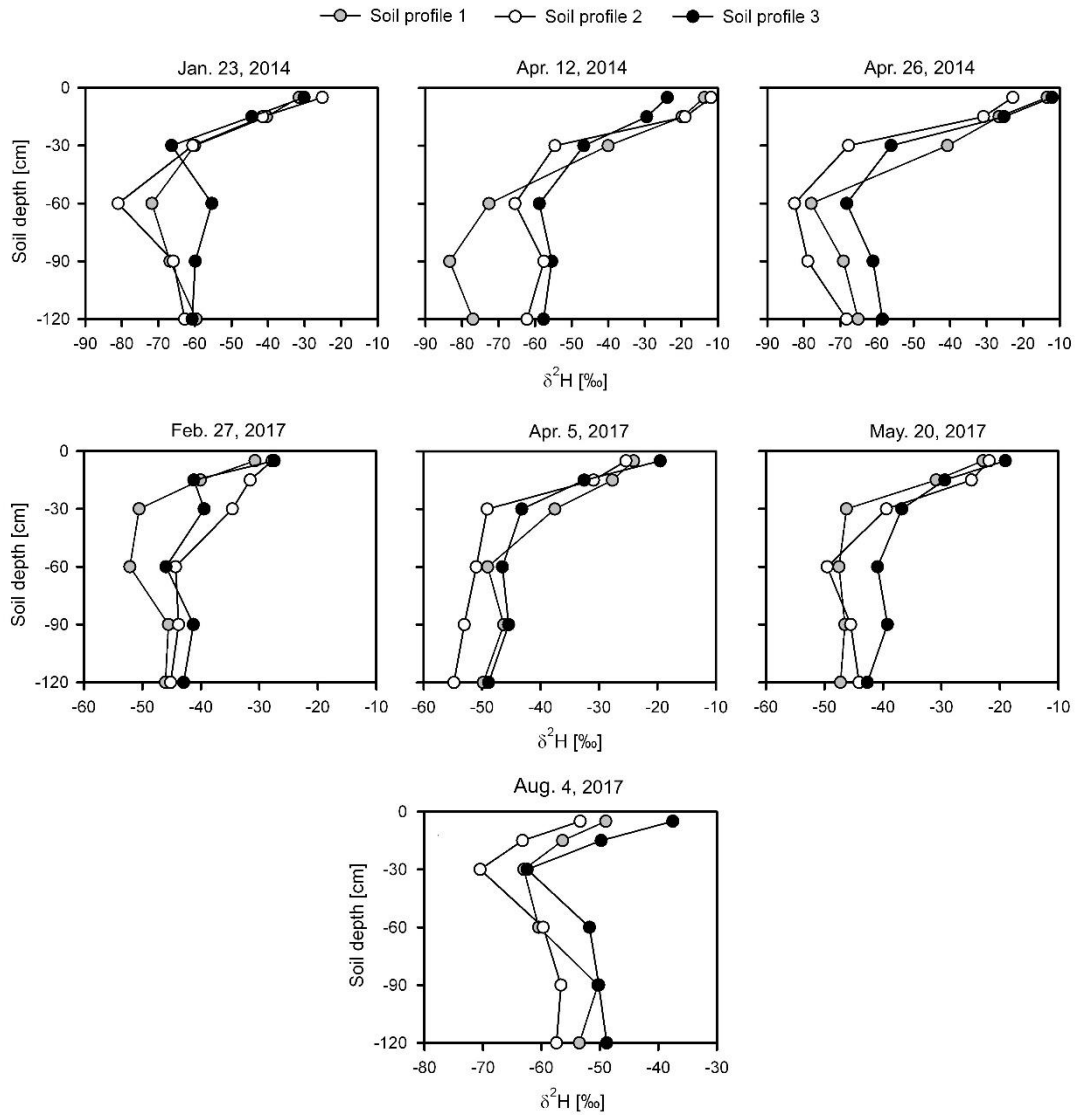

**Figure S2.** Hydrogen stable isotope ratios of the bulk soil water collected at different depths along the soil profile 1 (grey filled circles), soil profile 2 (open circles) and soil profile 3 (black filled circles) on January 23, April 12 and April 26, 2014 (dry season), February 27, April 5 and May 20, 2017 (dry season) and August 4, 2017 (wet season)

**Table S1.** Relative contributions of the different water sources to plant xylem water (mean  $\pm$  SD) per species and for the three sampling dates performed in 2014 dry season. Contributions were derived with the MixSIAR Bayesian mixing model framework, using the ‘informative’ prior approach

|                    | Sampling 1<br>(Jan. 23, 2014)   |                                 |                                 |                                 | Sampling 2<br>(Apr. 11, 2014)   |                                 |                                 |                                 | Sampling 3<br>(Apr. 26, 2014)   |                                 |                                 |                                 |
|--------------------|---------------------------------|---------------------------------|---------------------------------|---------------------------------|---------------------------------|---------------------------------|---------------------------------|---------------------------------|---------------------------------|---------------------------------|---------------------------------|---------------------------------|
|                    | Shade trees                     |                                 |                                 | Coffee shrubs                   | Shade trees                     |                                 |                                 | Coffee shrubs                   | Shade trees                     |                                 |                                 | Coffee shrubs                   |
|                    | <i>L. guatemalensis</i>         | <i>T. micrantha</i>             | <i>Inga vera</i>                | <i>C. arabica</i>               | <i>L. guatemalensis</i>         | <i>T. micrantha</i>             | <i>Inga vera</i>                | <i>C. arabica</i>               | <i>L. guatemalensis</i>         | <i>T. micrantha</i>             | <i>Inga vera</i>                | <i>C. arabica</i>               |
| Rain water         | 0.01 $\pm$ 0.02                 | 0.01 $\pm$ 0.02                 | 0.02 $\pm$ 0.04                 | 0.20 $\pm$ 0.17                 | 0.01 $\pm$ 0.02                 | 0.01 $\pm$ 0.03                 | 0.03 $\pm$ 0.07                 | 0.06 $\pm$ 0.14                 | 0.02 $\pm$ 0.03                 | 0.02 $\pm$ 0.04                 | 0.03 $\pm$ 0.06                 | 0.03 $\pm$ 0.10                 |
| Shallow soil water | 0.05 $\pm$ 0.07                 | 0.03 $\pm$ 0.06                 | 0.11 $\pm$ 0.12                 | 0.28 $\pm$ 0.30                 | 0.08 $\pm$ 0.09                 | 0.13 $\pm$ 0.12                 | 0.33 $\pm$ 0.17                 | <b>0.76<math>\pm</math>0.24</b> | 0.13 $\pm$ 0.12                 | 0.15 $\pm$ 0.13                 | 0.27 $\pm$ 0.17                 | <b>0.90<math>\pm</math>0.16</b> |
| Deep soil water    | <b>0.95<math>\pm</math>0.08</b> | <b>0.96<math>\pm</math>0.06</b> | <b>0.87<math>\pm</math>0.12</b> | <b>0.52<math>\pm</math>0.17</b> | <b>0.91<math>\pm</math>0.15</b> | <b>0.85<math>\pm</math>0.12</b> | <b>0.64<math>\pm</math>0.15</b> | 0.18 $\pm$ 0.13                 | <b>0.86<math>\pm</math>0.12</b> | <b>0.83<math>\pm</math>0.13</b> | <b>0.70<math>\pm</math>0.16</b> | 0.07 $\pm$ 0.09                 |

The water source that contributes more to tree transpiration is highlighted in bold for each species and sampling date.

**Table S2.** Relative contributions of the different water sources to plant xylem water (mean  $\pm$  SD) per species and for the three sampling dates performed in 2014 dry season. Contributions were derived with the MixSIAR Bayesian mixing model framework, using the ‘non-informative’ prior approach

|                    | Sampling 1<br>(Jan. 23, 2014)   |                                 |                                 |                                 | Sampling 2<br>(Apr. 11, 2014)   |                                 |                                 |                                 | Sampling 3<br>(Apr. 26, 2014)   |                                 |                                 |                                 |
|--------------------|---------------------------------|---------------------------------|---------------------------------|---------------------------------|---------------------------------|---------------------------------|---------------------------------|---------------------------------|---------------------------------|---------------------------------|---------------------------------|---------------------------------|
|                    | Shade trees                     |                                 |                                 | Coffee shrubs                   | Shade trees                     |                                 |                                 | Coffee shrubs                   | Shade trees                     |                                 |                                 | Coffee shrubs                   |
|                    | <i>L. guatemalensis</i>         | <i>T. micrantha</i>             | <i>Inga vera</i>                | <i>C. arabica</i>               | <i>L. guatemalensis</i>         | <i>T. micrantha</i>             | <i>Inga vera</i>                | <i>C. arabica</i>               | <i>L. guatemalensis</i>         | <i>T. micrantha</i>             | <i>Inga vera</i>                | <i>C. arabica</i>               |
| Rain water         | 0.03 $\pm$ 0.04                 | 0.02 $\pm$ 0.03                 | 0.06 $\pm$ 0.06                 | 0.29 $\pm$ 0.13                 | 0.03 $\pm$ 0.04                 | 0.05 $\pm$ 0.05                 | 0.11 $\pm$ 0.11                 | 0.27 $\pm$ 0.22                 | 0.06 $\pm$ 0.06                 | 0.06 $\pm$ 0.07                 | 0.09 $\pm$ 0.09                 | 0.26 $\pm$ 0.24                 |
| Shallow soil water | 0.03 $\pm$ 0.05                 | 0.02 $\pm$ 0.04                 | 0.06 $\pm$ 0.09                 | 0.12 $\pm$ 0.18                 | 0.05 $\pm$ 0.06                 | 0.08 $\pm$ 0.09                 | 0.21 $\pm$ 0.18                 | <b>0.44<math>\pm</math>0.36</b> | 0.09 $\pm$ 0.10                 | 0.10 $\pm$ 0.10                 | 0.17 $\pm$ 0.16                 | <b>0.58<math>\pm</math>0.37</b> |
| Deep soil water    | <b>0.94<math>\pm</math>0.12</b> | <b>0.96<math>\pm</math>0.05</b> | <b>0.88<math>\pm</math>0.10</b> | <b>0.59<math>\pm</math>0.12</b> | <b>0.92<math>\pm</math>0.08</b> | <b>0.87<math>\pm</math>0.10</b> | <b>0.68<math>\pm</math>0.14</b> | 0.29 $\pm$ 0.17                 | <b>0.86<math>\pm</math>0.11</b> | <b>0.84<math>\pm</math>0.11</b> | <b>0.74<math>\pm</math>0.14</b> | 0.16 $\pm$ 0.14                 |

The water source that contributes more to tree transpiration is highlighted in bold for each species and sampling date.

**Table S3.** Relative contributions of the different water sources to plant xylem water (mean  $\pm$  SD) per species and for the three sampling dates performed in the 2017 dry season. Contributions were derived with the MixSIAR Bayesian mixing model framework, using the ‘informative’ prior approach

|                    | Sampling 1<br>(Feb. 27, 2017)   |                                 |                                      |                                 | Sampling 2<br>(Apr. 5, 2017)    |                                 |                                      |                                      | Sampling 3<br>(May 20, 2017)    |                                 |                                      |                                      |
|--------------------|---------------------------------|---------------------------------|--------------------------------------|---------------------------------|---------------------------------|---------------------------------|--------------------------------------|--------------------------------------|---------------------------------|---------------------------------|--------------------------------------|--------------------------------------|
|                    | Shade trees                     |                                 | Coffee shrubs                        |                                 | Shade trees                     |                                 | Coffee shrubs                        |                                      | Shade trees                     |                                 | Coffee shrubs                        |                                      |
|                    | <i>L. guatemalensis</i>         | <i>T. micrantha</i>             | <i>Inga vera</i>                     | <i>C. arabica</i>               | <i>L. guatemalensis</i>         | <i>T. micrantha</i>             | <i>Inga vera</i>                     | <i>C. arabica</i>                    | <i>L. guatemalensis</i>         | <i>T. micrantha</i>             | <i>Inga vera</i>                     | <i>C. arabica</i>                    |
| Rain water         | 0.00 $\pm$ 0.01                 | 0.01 $\pm$ 0.02                 | 0.01 $\pm$ 0.0<br>2                  | 0.14 $\pm$ 0.14                 | 0.06 $\pm$ 0.08                 | 0.02 $\pm$ 0.04                 | 0.01 $\pm$ 0.0<br>2                  | <b>0.44<math>\pm</math>0.1<br/>6</b> | 0.01 $\pm$ 0.03                 | 0.01 $\pm$ 0.02                 | 0.00 $\pm$ 0.0<br>1                  | 0.04 $\pm$ 0.1<br>0                  |
| Shallow soil water | 0.04 $\pm$ 0.09                 | 0.11 $\pm$ 0.18                 | 0.14 $\pm$ 0.2<br>2                  | <b>0.47<math>\pm</math>0.40</b> | 0.25 $\pm$ 0.21                 | 0.25 $\pm$ 0.23                 | 0.06 $\pm$ 0.0<br>9                  | 0.24 $\pm$ 0.2<br>7                  | 0.07 $\pm$ 0.12                 | 0.08 $\pm$ 0.15                 | 0.02 $\pm$ 0.0<br>5                  | <b>0.91<math>\pm</math>0.2<br/>1</b> |
| Deep soil water    | <b>0.95<math>\pm</math>0.09</b> | <b>0.89<math>\pm</math>0.18</b> | <b>0.86<math>\pm</math>0.2<br/>2</b> | 0.39 $\pm$ 0.28                 | <b>0.70<math>\pm</math>0.19</b> | <b>0.74<math>\pm</math>0.23</b> | <b>0.93<math>\pm</math>0.1<br/>0</b> | 0.32 $\pm$ 0.1<br>5                  | <b>0.92<math>\pm</math>0.12</b> | <b>0.92<math>\pm</math>0.15</b> | <b>0.98<math>\pm</math>0.0<br/>5</b> | 0.06 $\pm$ 0.1<br>2                  |

The water source that contributes more to tree transpiration is highlighted in bold for each species and sampling date.

**Table S4.** Relative contributions of the different water sources to plant xylem water (mean  $\pm$  SD) per species and for the three sampling dates performed in the 2017 dry season. Contributions were derived with the MixSIAR Bayesian mixing model framework, using the ‘non-informative’ prior approach

|                    | Sampling 1<br>(Feb. 27, 2017)   |                                 |                                      |                                 | Sampling 2<br>(Apr. 5, 2017)    |                                 |                                      |                                      | Sampling 3<br>(May 20, 2017)    |                                 |                                      |                                      |
|--------------------|---------------------------------|---------------------------------|--------------------------------------|---------------------------------|---------------------------------|---------------------------------|--------------------------------------|--------------------------------------|---------------------------------|---------------------------------|--------------------------------------|--------------------------------------|
|                    | Shade trees                     |                                 | Coffee shrubs                        |                                 | Shade trees                     |                                 | Coffee shrubs                        |                                      | Shade trees                     |                                 | Coffee shrubs                        |                                      |
|                    | <i>L. guatemalensis</i>         | <i>T. micrantha</i>             | <i>Inga vera</i>                     | <i>C. arabica</i>               | <i>L. guatemalensis</i>         | <i>T. micrantha</i>             | <i>Inga vera</i>                     | <i>C. arabica</i>                    | <i>L. guatemalensis</i>         | <i>T. micrantha</i>             | <i>Inga vera</i>                     | <i>C. arabica</i>                    |
| Rain water         | 0.01 $\pm$ 0.02                 | 0.02 $\pm$ 0.03                 | 0.02 $\pm$ 0.0<br>3                  | 0.23 $\pm$ 0.12                 | 0.11 $\pm$ 0.08                 | 0.06 $\pm$ 0.06                 | 0.04 $\pm$ 0.0<br>4                  | <b>0.48<math>\pm</math>0.1<br/>0</b> | 0.01 $\pm$ 0.03                 | 0.01 $\pm$ 0.03                 | 0.01 $\pm$ 0.0<br>2                  | 0.08 $\pm$ 0.1<br>5                  |
| Shallow soil water | 0.03 $\pm$ 0.06                 | 0.08 $\pm$ 0.14                 | 0.10 $\pm$ 0.1<br>9                  | 0.25 $\pm$ 0.32                 | 0.15 $\pm$ 0.15                 | 0.16 $\pm$ 0.17                 | 0.07 $\pm$ 0.0<br>9                  | 0.17 $\pm$ 0.1<br>7                  | 0.05 $\pm$ 0.10                 | 0.05 $\pm$ 0.11                 | 0.01 $\pm$ 0.0<br>4                  | <b>0.85<math>\pm</math>0.2<br/>9</b> |
| Deep soil water    | <b>0.95<math>\pm</math>0.07</b> | <b>0.90<math>\pm</math>0.15</b> | <b>0.88<math>\pm</math>0.1<br/>9</b> | <b>0.53<math>\pm</math>0.23</b> | <b>0.74<math>\pm</math>0.13</b> | <b>0.77<math>\pm</math>0.16</b> | <b>0.88<math>\pm</math>0.1<br/>0</b> | 0.36 $\pm$ 0.1<br>0                  | <b>0.94<math>\pm</math>0.11</b> | <b>0.94<math>\pm</math>0.12</b> | <b>0.98<math>\pm</math>0.0<br/>4</b> | 0.08 $\pm$ 0.1<br>6                  |

The water source that contributes more to tree transpiration is highlighted in bold for each species and sampling date.

**Table S5.** Relative contributions of the different water sources to plant xylem water (mean  $\pm$  SD) per species and for the sampling performed in the 2017 wet season. Contributions were derived with the MixSIAR Bayesian mixing model framework, using the ‘informative’ prior approach

| Sampling<br>(Aug.4, 2017) |                                 |                                 |                                 |                                 |
|---------------------------|---------------------------------|---------------------------------|---------------------------------|---------------------------------|
|                           | Shade trees                     |                                 |                                 | Coffee shrubs                   |
|                           | <i>L. guatemalensis</i>         | <i>T. micrantha</i>             | <i>Inga vera</i>                | <i>C. arabica</i>               |
| Rain water                | 0.07 $\pm$ 0.11                 | 0.01 $\pm$ 0.02                 | 0.01 $\pm$ 0.04                 | <b>0.69<math>\pm</math>0.22</b> |
| Shallow soil water        | 0.30 $\pm$ 0.39                 | <b>0.72<math>\pm</math>0.39</b> | 0.29 $\pm$ 0.36                 | 0.18 $\pm$ 0.21                 |
| Deep soil water           | <b>0.64<math>\pm</math>0.37</b> | 0.27 $\pm$ 0.38                 | <b>0.70<math>\pm</math>0.36</b> | 0.14 $\pm$ 0.17                 |

The water source that contributes more to tree transpiration is highlighted in bold for each species and sampling date.

**Table S6.** Relative contributions of the different water sources to plant xylem water (mean  $\pm$  SD) per species and for the sampling performed in the 2017 wet season. Contributions were derived with the MixSIAR Bayesian mixing model framework, using the ‘non-informative’ prior approach

|                    | Sampling<br>(Aug.4, 2017)       |                                 |                                 |                                 |
|--------------------|---------------------------------|---------------------------------|---------------------------------|---------------------------------|
|                    | Shade trees                     |                                 |                                 | Coffee shrubs                   |
|                    | <i>L. guatemalensis</i>         | <i>T. micrantha</i>             | <i>Inga vera</i>                | <i>C. arabica</i>               |
| Rain water         | 0.11 $\pm$ 0.12                 | 0.02 $\pm$ 0.04                 | 0.04 $\pm$ 0.06                 | <b>0.69<math>\pm</math>0.22</b> |
| Shallow soil water | 0.25 $\pm$ 0.34                 | <b>0.63<math>\pm</math>0.40</b> | 0.27 $\pm$ 0.34                 | 0.16 $\pm$ 0.19                 |
| Deep soil water    | <b>0.64<math>\pm</math>0.32</b> | 0.35 $\pm$ 0.39                 | <b>0.69<math>\pm</math>0.33</b> | 0.15 $\pm$ 0.17                 |

The water source that contributes more to tree transpiration is highlighted in bold for each species and sampling date.
