# Supplementary material for: Coffee and shade trees show complementary use of soil water in a traditional agroforestry ecosystem
Source: Copernicus journal article supplement (doi:10.5194/hess-2019-329), 2019-07-26
Supplement: Supplementary file [file hess-2019-329-RC2-supplement.pdf]

General comment

This study analyses plant water source partitioning in a coffee agroforestry system along seasons with contrasting soil moisture conditions. For that, the authors applied stable isotope techniques and Bayesian mixing models (MixSIAR) in order to test for the complementary use of soil water in space and time by coffee plants and shade trees. The importance of the study comes from the fact that ecohydrological relations in this type of traditional agroforestry systems are completely unknown, in contrast to those of intensive monospecific plantations. A novel aspect of the study is the inclusion of root and nutrient distributions within the framework of stable isotope mixing models, which is a usually underestimated capability of such models. That should improve their accuracy since plant water source partitioning is obviously constrained by root distribution and soil profiles of nutrient availability. Overall, this is a well-designed, rigorous study, that is also clearly presented and well-written. Methods and results are concisely described and figures and tables are easy to interpret. Similar studies of plant water source partitioning are numerous, so it could be said that this study is not especially original. However, I find valuable to report this type of data from regions where they are scarce (*i.e.* Central and South America or Africa, see Barbeta & Peñuelas, 2017; Evaristo & McDonnell, 2017).

Although my general assessment of the manuscript is highly positive, I miss some caution regarding stable isotope techniques. While this is a well-established approach, recent studies pointed to methodological issues linked to fractionation processes within the soil matrix (Orlowski *et al.*, 2018; Gaj *et al.*, 2019; Oerter & Bowen, 2019; Oerter *et al.*, 2019), along the soil-plant continuum (Vargas *et al.*, 2017; Barbeta *et al.*, 2019) or within plant tissues (Zhao *et al.*, 2016). Not all ecohydrological systems may be affected by those fractionation processes, and oxygen isotopes seem to still be highly reliable (Zhao *et al.*, 2016; Vargas *et al.*, 2017; Barbeta *et al.*, 2019). Still, in Fig. 3, I observe that xylem water isotopes do not match very well with soil water isotopes from either depth. This is clearer for shade trees. A similar pattern arises in the deuterium excess boxplots. A thorough consideration of potential fractionation processes would require extensive additional analyses, which I think that it is not realistic to ask the authors to do. A more plausible solution is an explanation on why the authors think that fractionation processes are not relevant for their study. It might also be considered to run MixSIAR models separately for oxygen and hydrogen isotopes to check if there are significant discrepancies between them (as in Evaristo *et al.*, 2017; Barbeta *et al.*, 2019). As I said, it is known that fractionation processes do not affect in the same proportion oxygen and hydrogen isotopes. In any case, I believe that these emerging issues cannot longer be ignored by plant water source studies using stable isotopes.

Minor comments

L38 It is not completely clear what does 'precipitation conditions' mean.

L65 Species name (*Cedrela odorata*) should not be in capital letters.

L191 The high clay content is likely to produce soil water isotopic fractionation (Oerter *et al.*, 2014).

L218 The sampling of different plant parts in coffee plants and shade trees (cores VS branches) could have led to a different proportion of internal plant water pools in the xylem water samples of each group.

L223 I assume that bark was peeled off from coffee shrubs, too.

L298 Recent precipitation, especially in periods with relatively wet soil conditions, could in fact percolate faster towards deeper layers. So, rainfall is not necessarily representative of near surface soil water.

L304 The use of prior information is a very interesting point of the study.

## References

**Barbeta A, Jones SP, Clavé L, Wingate L, Gimeno TE, Fréjaville B, Wohl S, Ogée J. 2019.** Unexplained hydrogen isotope offsets complicate the identification and quantification of tree water sources in a riparian forest. *Hydrology and Earth System Sciences Discussions* **23**: 1–31.

**Barbeta A, Peñuelas J. 2017.** Relative contribution of groundwater to plant transpiration estimated with stable isotopes. *Scientific reports* **7**: 10580.

**Evaristo J, McDonnell JJ. 2017.** Prevalence and magnitude of groundwater use by vegetation : a global stable isotope meta-analysis. *Scientific reports*: 1–12.

**Evaristo J, McDonnell JJ, Clemens J. 2017.** Plant source water apportionment using stable isotopes: A comparison of simple linear, two-compartment mixing model approaches. *Hydrological Processes* **31**: 3750–3758.

**Gaj M, Lamparter A, Woche SK, Bachmann J, McDonnell JJ, Stange CF. 2019.** The Role of Matric Potential, Solid Interfacial Chemistry, and Wettability on Isotopic Equilibrium Fractionation. *Vadose Zone Journal* **18**: 0.

**Oerter EJ, Bowen GJ. 2019.** Spatiotemporal heterogeneity in soil water stable isotopic composition and its ecohydrologic implications in semi-arid ecosystems. *Hydrological Processes*: 0–2.

**Oerter E, Finstad K, Schaefer J, Goldsmith GR, Dawson T, Amundson R. 2014.** Oxygen isotope fractionation effects in soil water via interaction with cations (Mg, Ca, K, Na) adsorbed to phyllosilicate clay minerals. *Journal of Hydrology* **515**: 1–9.

**Oerter EJ, Siebert G, Bowling DR, Bowen G. 2019.** Soil water vapor isotopes identify missing water source for streamside trees. *Ecohydrology*: e2083.

**Orlowski N, Breuer L, Angeli N, Boeckx P. 2018.** Inter-laboratory comparison of cryogenic water extraction systems for stable isotope analysis of soil water. *Hydrology and Earth System Sciences*: 1–36.

**Vargas AI, Schaffer B, Yuhong L, Sternberg L da SL. 2017.** Testing plant use of mobile vs immobile soil water sources using stable isotope experiments. *New Phytologist* **215**: 582–594.

**Zhao L, Wang L, Cernusak LA, Liu X, Xiao H, Zhou M, Zhang S. 2016.** Significant Difference in Hydrogen Isotope Composition Between Xylem and Tissue Water in *Populus Euphratica*. *Plant Cell and Environment* **39**: 1848–1857.
